# Supplementary material for: The coordination structure of the extracted nickel(ii) complex with a synergistic mixture containing dinonylnaphthalene sulfonic acid and 2-ethylhexyl 4-pyridinecarboxylate ester
Source: Royal Society of Chemistry journal article supplement (doi:10.1039/c6dt04369k), 2016-12-19
Supplement: c6dt04369k1.pdf [file c6dt04369k1.pdf]

## Supplementary Information

The Coordination Structure of the Extracted Nickel(II) Complex  
with a Synergistic Mixture Containing Dinonylnaphthalene  
Sulfonic Acid and 2-Ethylhexyl-4-Pyridine carboxylate Ester

Jiyuan Li, Huiping Hu,<sup>✉</sup> Shan Zhu, Fang Hu and Yongxi Wang

## Outline

$^1\text{H}$ -NMR Spectra

Crystallographic details

FI-IR details

ESI-MS Spectra

## <sup>1</sup>H-NMR Spectra

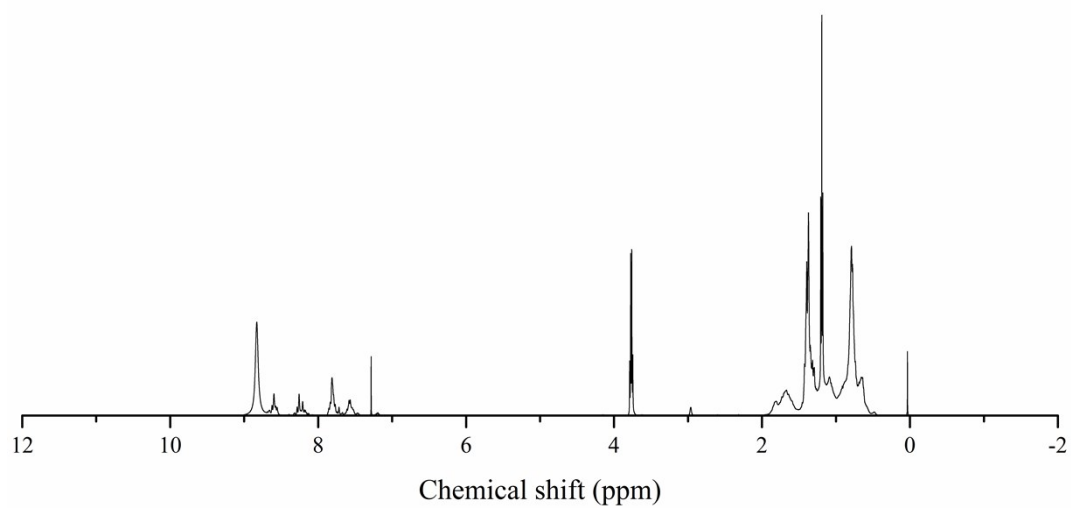

**Figure S1** <sup>1</sup>H-NMR spectrum of purified HDNNS

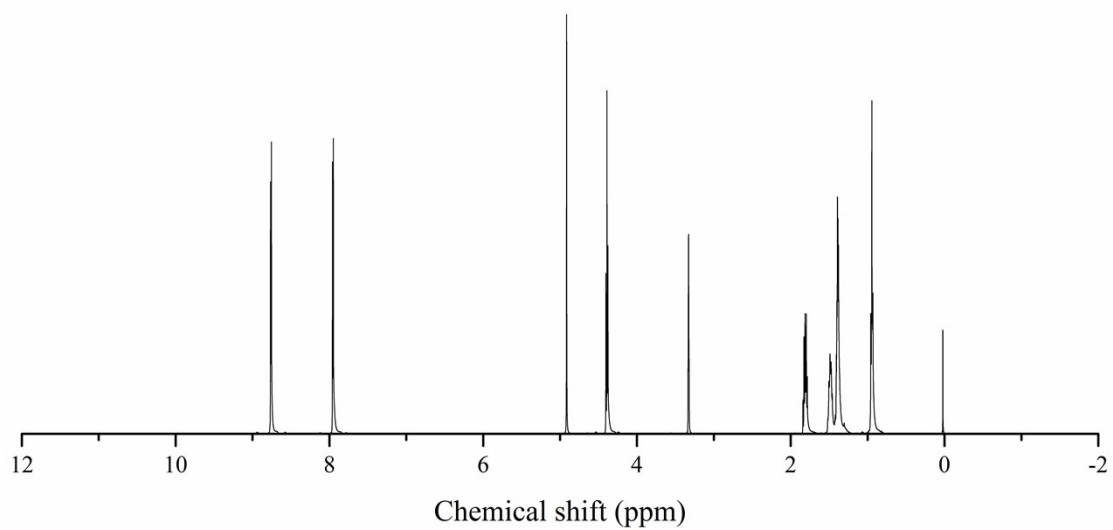

**Figure S2** <sup>1</sup>H-NMR spectrum of n-hexyl-4-pyridinecarboxylate ester (L)

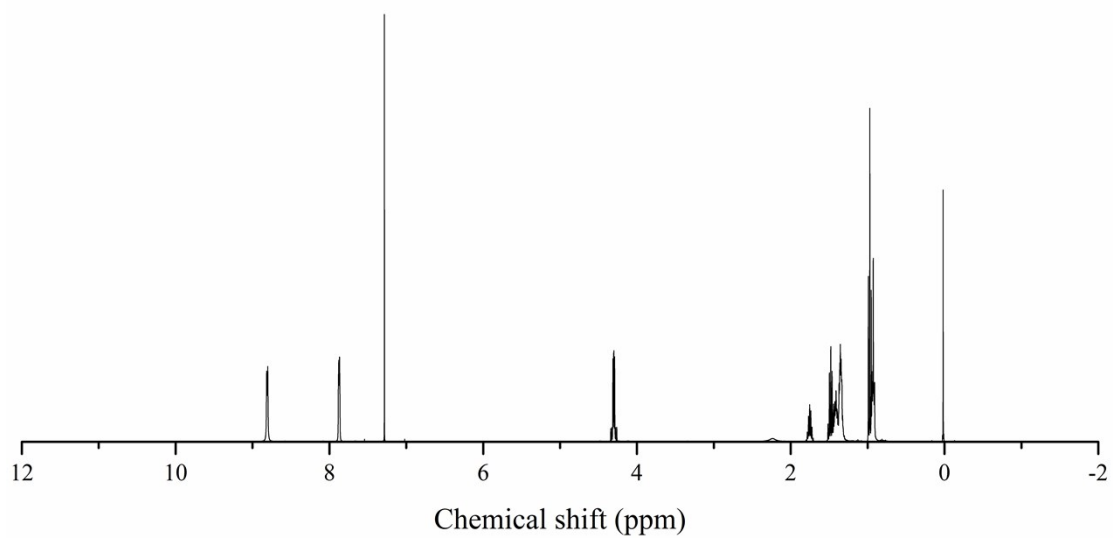

**Figure S3**  $^1\text{H-NMR}$  spectrum of 2-ethylhexyl 4-pyridinecarboxylate ester (4PC, L<sup>II</sup>)

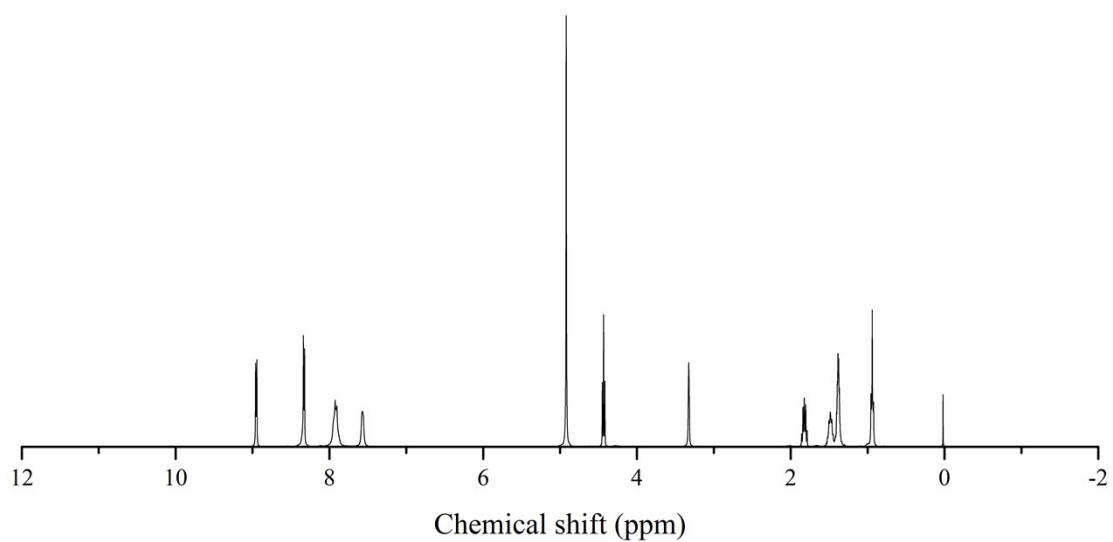

**Figure S4**  $^1\text{H-NMR}$  spectrum of the nickel synergist complex

### Crystallographic details

**Table S1** Important bond lengths (Å) and angles (°)

|                                        |           |                                       |           |
|----------------------------------------|-----------|---------------------------------------|-----------|
| Ni1-O1W                                | 2.063(3)  | Ni1-O2W                               | 2.071(3)  |
| Ni1-N1                                 | 2.104(3)  |                                       |           |
| O1W-Ni1-O1W <sup>a</sup>               | 180.0     | O2W-Ni1-N1                            | 88.66(11) |
| O1W-Ni1-O2W                            | 91.35(11) | O2W <sup>a</sup> -Ni1-N1              | 91.34(11) |
| O1W <sup>a</sup> -Ni1-O2W              | 88.65(11) | O1W-Ni1-N1 <sup>a</sup>               | 88.18(10) |
| O1W-Ni1-O2W <sup>a</sup>               | 88.65(11) | O1W <sup>a</sup> -Ni1-N1 <sup>a</sup> | 91.82(10) |
| O1W <sup>a</sup> -Ni1-O2W <sup>a</sup> | 91.35(11) | O2W-Ni1-N1 <sup>a</sup>               | 91.34(11) |
| O2W <sup>a</sup> -Ni1-O2W              | 180.0     | O2W <sup>a</sup> -Ni1-N1 <sup>a</sup> | 88.66(11) |
| O1W-Ni1-N1                             | 91.82(10) | N1-Ni1-N1 <sup>a</sup>                | 180.00(5) |
| O1W <sup>a</sup> -Ni1-N1               | 88.18(10) |                                       |           |

Symmetry code: <sup>a</sup>-x, -y+1, -z+2.

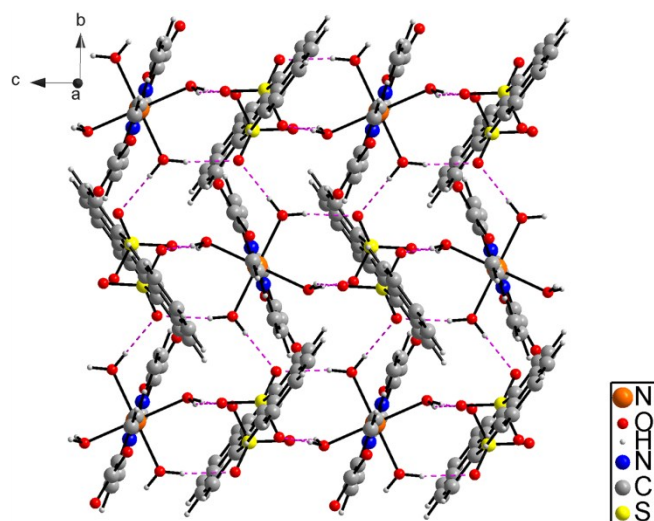

**Figure S5** 2D plane for alternating rows of  $\text{Ni}(\text{H}_2\text{O})_4(\text{L})_2^{2+}$  cations linked by naphthalene-2-sulfonate anions spacers in the nickel synergist complex as viewed along the a-axis

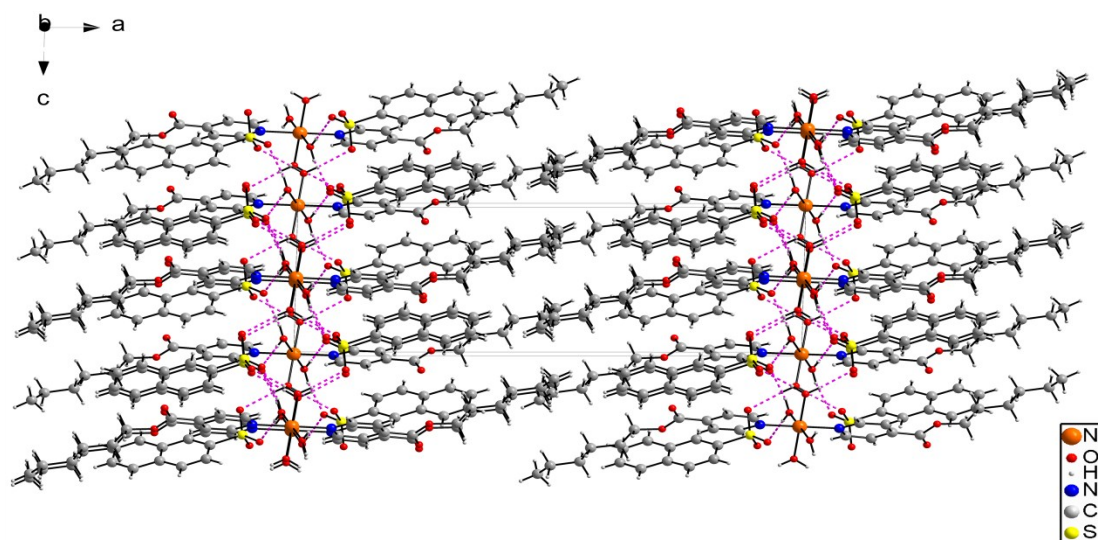

**Figure S6** The packing structure of the nickel synergist complex viewed down the b-axis.

**Table S2** Summary of hydrogen bonding (Å and °) for the nickel synergist complex

| D-H...A      | Symmetry operation on A | D-H (Å) | H...A (Å) | D...A (Å) | D-H...A (°) |
|--------------|-------------------------|---------|-----------|-----------|-------------|
| O1W-H11...O5 | -x, -y+1, -z+1          | 0.815   | 1.940     | 2.755     | 177.30      |
| O1W-H12...O6 | x, y, z                 | 0.816   | 1.998     | 2.795     | 165.44      |
| O2W-H21...O7 | -x, y+1/2, -z+3/2       | 0.822   | 1.975     | 2.798     | 179.16      |
| O2W-H22...O7 | -x, -y+1, -z+1          | 0.815   | 2.031     | 2.829     | 166.22      |

**FI-IR details****Table S3** Infrared frequencies and assignments of L<sup>I</sup>, HNS, the nickel synergist complex, L<sup>II</sup>, HDNNS and the extracted Ni(II) complex in the non-polar organic phase

| Vibrational modes          | L <sup>I</sup> | HNS  | The nickel synergist complex | L <sup>II</sup> | HDNNS | The extracted Ni( II ) complex |
|----------------------------|----------------|------|------------------------------|-----------------|-------|--------------------------------|
| $\nu_{as}(\text{CH}_3)$    | 2957           |      | 2956                         | 2960            | 2960  | 2959                           |
| $\nu_{as}(\text{CH}_2)$    | 2858           |      | 2861                         | 2866            | 2870  | 2868                           |
| $\nu_s(\text{CH}_3)$       | 2928           |      | 2928                         | 2929            | 2928  | 2929                           |
| $\nu(\text{C}=\text{O})$   | 1728           |      | 1731                         | 1730            |       | 1731                           |
| $\delta_{as}(\text{CH}_3)$ | 1462           |      | 1465                         | 1463            | 1464  | 1462                           |
| $\delta_s(\text{CH}_3)$    | 1383           |      | 1383                         | 1383            | 1382  | 1382                           |
| $\nu(\text{py})$           | 1407           |      | 1417                         | 1407            |       | 1417                           |
| $\nu(\text{C}=\text{C})$   | 1638           | 1644 | 1638                         | 1636            | 1631  | 1634                           |
|                            | 1561           | 1501 | 1562                         | 1562            | 1502  | 1562                           |
|                            |                |      | 1503                         |                 |       | 1502                           |
| $\nu(\text{C}-\text{O})$   | 1279           |      | 1287                         | 1281            |       | 1280                           |
| $\nu_s(\text{S}=\text{O})$ |                | 1043 | 1034                         |                 | 1051  | 1040                           |

## ESI-MS Spectra

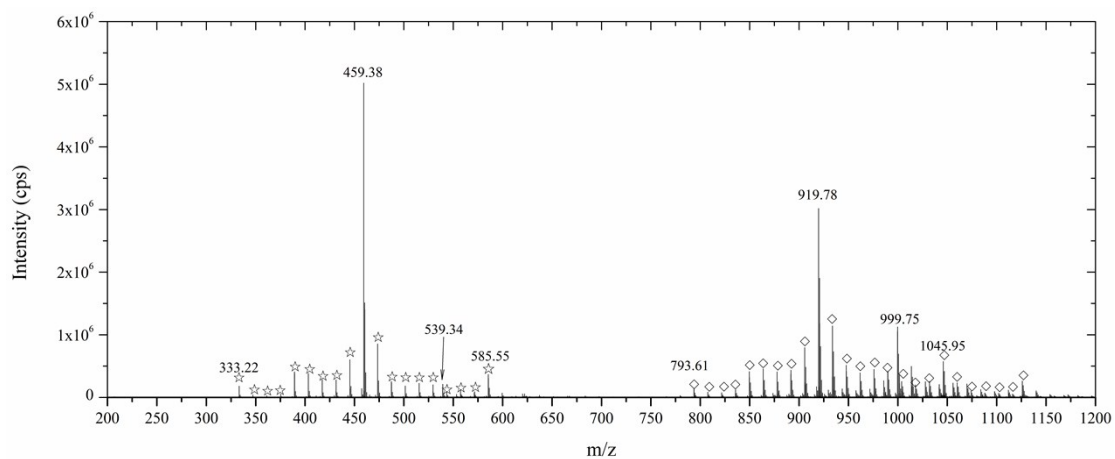

**Figure S7** The ESI-MS spectrum of the purified HDNNS in n-hexane with a final concentration of  $10^{-3} \text{ mol L}^{-1}$ ; ☆ represents species of monomer HDNNS homologues and ◇ represents species of dimer (HDNNS)<sub>2</sub> where one of HDNNS was replaced by HDNNS homologues.

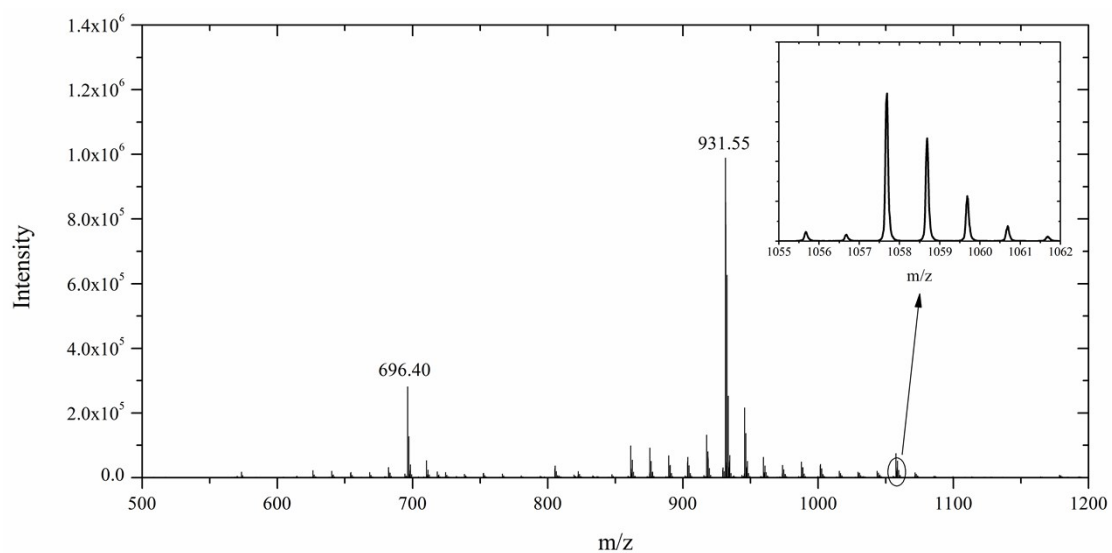

**Figure S8** The ESI-MS spectrum of the synergistic extractants in the non-polar organic phase.
